# Supplementary material for: Mouse mitochondrial lipid composition is defined by age in brain and muscle
Source: PubMed Central journal article supplement (PMC5391243; doi:10.18632/aging.101204), 2017-03-21
Supplement: aging-09-986-s001.pdf [file aging-09-986-s001.pdf]

## SUPPLEMENTARY MATERIAL

**Supplementary Table 1. The top ten lipids that change in abundance in aged brain mitochondria.**

| <i>m/z</i> | Retention time (mins) | Adduct | ESI mode | Lipid identity                | Wilcoxon rank <i>p</i> value | Wilcoxon rank and Bonferroni correction <i>p</i> value | Change in abundance with age | Fold change |
|------------|-----------------------|--------|----------|-------------------------------|------------------------------|--------------------------------------------------------|------------------------------|-------------|
| 906.632    | 5.03                  | M+H    | +        | Hydroxylated Sulfatide (42:2) | 0.000011                     | 0.024                                                  | ↑                            | 6.74        |
| 826.672    | 5.02                  | M+H    | +        | PC(40:3)                      | 0.000011                     | 0.024                                                  | ↑                            | 4.68        |
| 810.643    | 5.52                  | M-H    | -        | PE(42:2)                      | 0.000011                     | 0.024                                                  | ↑                            | 4.17        |
| 1064.721   | 6.12                  | M-H    | -        | PE(O-44:2)                    | 0.000011                     | 0.024                                                  | ↑                            | 3.86        |
| 856.676    | 5.8                   | M+H    | +        | PE(44:2)                      | 0.000011                     | 0.024                                                  | ↑                            | 3.22        |
| 866.594    | 5.7                   | M+H    | -        | PS(42:4)                      | 0.000011                     | 0.024                                                  | ↓                            | -3.83       |
| 732.588    | 5.89                  | M+H    | +        | PE (o-32:1)                   | 0.000011                     | 0.024                                                  | ↓                            | -3.19       |
| 335.295    | 2.12                  | M-H    | -        | Docosadienoic acid C22:4      | 0.000022                     | 0.048                                                  | ↓                            | -3          |
| 690.508    | 3.7                   | M-H    | -        | PE(32:0)                      | 0.000011                     | 0.024                                                  | ↓                            | -2.25       |
| 307.264    | 1.71                  | M-H    | -        | Eicosadienoic acid C20:2      | 0.000011                     | 0.024                                                  | ↓                            | -2.21       |

The mitochondrial lipidome was compared between young 4-11 weeks (n=10) and old 78 weeks (n=10) brain tissue. The top five lipids with the greatest significant difference and highest fold change increase with ageing were selected. The top five lipids with the greatest significant difference and highest fold change decrease with ageing were selected. Lipids were identified using the Human metabolome database and Lipid maps. Only lipid identities with a mass error of less than 5ppm were selected. Abbreviations: phosphatidylcholine (PC), phosphatidylserine (PS) and phosphatidylethanolamine (PE).

**Supplementary Table 2. The top ten lipids that change in abundance in aged skeletal muscle mitochondria.**

| <i>m/z</i> | Retention time (mins) | Adduct   | ESI mode | Lipid identity        | Wilcoxon rank <i>p</i> value | Wilcoxon rank and Bonferroni correction <i>p</i> value | Change in abundance with age | Fold change |
|------------|-----------------------|----------|----------|-----------------------|------------------------------|--------------------------------------------------------|------------------------------|-------------|
| 642.568    | 5.25                  | M-H      | -        | Cer(36:0)             | 0.000041                     | 0.128                                                  | ↑                            | 12.37       |
| 1466.917   | 6.56                  | M+Na-2H  | -        | CL(72:10)             | 0.000041                     | 0.128                                                  | ↑                            | 9.31        |
| 874.537    | 5.11                  | M+H      | +        | PC(42:11)             | 0.000041                     | 0.128                                                  | ↑                            | 7.52        |
| 1693.97    | 7.21                  | Na-Ac+Na | -        | CL (70:6)             | 0.000041                     | 0.128                                                  | ↑                            | 7.46        |
| 876.575    | 3.45                  | M+Ac-H   | -        | PE(42:7)              | 0.000041                     | 0.128                                                  | ↑                            | 7.16        |
| 564.305    | 0.81                  | M+Na     | +        | LysoPC(20:5/0:0)      | 0.000041                     | 0.128                                                  | ↓                            | -23.19      |
| 1504.035   | 4.16                  | 2M+Na-2H | -        | PE(36:3)              | 0.000041                     | 0.128                                                  | ↓                            | -12.96      |
| 331.263    | 1.22                  | M-H      | -        | Docosatetraenoic acid | 0.000041                     | 0.128                                                  | ↓                            | -10.12      |
| 862.627    | 5.39                  | M+Na     | +        | PC(40:3)              | 0.000041                     | 0.128                                                  | ↓                            | -7.75       |
| 924.671    | 5.52                  | M+Ac-H   | -        | PC(42:4)              | 0.000041                     | 0.128                                                  | ↓                            | -7.32       |

The mitochondrial lipidome was compared between young 4-11 weeks (n=9) and old 78 weeks (n=9) skeletal muscle tissue. The top five lipids with the greatest significant difference and highest fold change increase with ageing were selected. The top five lipids with the greatest significant difference and highest fold change decrease with ageing were selected. Lipids were identified using the Human metabolome database and Lipid maps. Only lipid identities with a mass error of less than 5ppm were selected. Abbreviations: ceramide (cer), cardiolipin (CL), phosphatidylcholine (PC), lysophosphatidylcholine (lysoPC) and phosphatidylethanolamine (PE).

**Supplementary Table 3. The top ten lipids that change in abundance in aged skeletal muscle mitochondria.**

| <i>m/z</i> | Retention time (mins) | ESI mode | Lipid tentative identification | Fatty acid group | Change in abundance with ageing | Fold change |
|------------|-----------------------|----------|--------------------------------|------------------|---------------------------------|-------------|
| 391.358    | 3.34                  | -        | C26:2                          | PUFA             | ↓                               | -27.62      |
| 361.311    | 2.27                  | -        | C24:3                          | PUFA             | ↓                               | -9.36       |
| 313.078    | 3.28                  | -        | C20:0                          | SFA              | ↓                               | -6.92       |
| 393.373    | 4.01                  | -        | C26:1                          | MUFA             | ↓                               | -6.75       |
| 363.327    | 2.65                  | -        | C24:2                          | PUFA             | ↓                               | -5.86       |
| 293.248    | 1.51                  | -        | C19:2                          | PUFA             | ↓                               | -5.85       |
| 385.311    | 2.05                  | -        | C26:5                          | PUFA             | ↓                               | -5.53       |
| 357.28     | 1.69                  | -        | C24:5                          | PUFA             | ↓                               | -3.27       |
| 387.327    | 2.35                  | -        | C26:4                          | PUFA             | ↓                               | -3.22       |
| 335.295    | 2.12                  | -        | C22:2                          | PUFA             | ↓                               | -3.00       |
| 277.217    | 1.17                  | -        | C18:3 Linolenic                | PUFA             | ↓                               | -2.65       |
| 359.295    | 1.92                  | -        | C24:4                          | PUFA             | ↓                               | -2.46       |
| 395.389    | 4.93                  | -        | C26:0                          | SFA              | ↓                               | -2.19       |
| 329.248    | 1.37                  | -        | C22:5 Docosapentaenoic acid    | PUFA             | ↓                               | -1.99       |
| 367.358    | 4.03                  | -        | C24:0                          | SFA              | ↓                               | -1.93       |
| 227.201    | 1.21                  | -        | C14:0                          | SFA              | ↓                               | -1.75       |
| 333.28     | 1.85                  | -        | C22:3                          | PUFA             | ↓                               | -1.75       |
| 279.233    | 1.36                  | -        | Linoelic                       | PUFA             | ↓                               | -1.71       |
| 305.248    | 1.47                  | -        | C20:3 Eicosatrienoic acid      | PUFA             | ↓                               | -1.67       |
| 331.264    | 1.57                  | -        | C22:4                          | PUFA             | ↓                               | -1.66       |
| 337.311    | 1.53                  | -        | C22:1                          | MUFA             | ↓                               | -1.62       |
| 199.17     | 0.88                  | -        | C12 SFFA                       | SFA              | ↓                               | -1.55       |
| 355.264    | 1.47                  | -        | C24:6                          | PUFA             | ↓                               | -1.54       |
| 303.233    | 1.32                  | -        | C20:4 Arachadonic acid         | PUFA             | ↓                               | -1.52       |
| 317.248    | 1.45                  | -        | C21:5                          | PUFA             | ↓                               | -1.52       |
| 295.227    | 0.61                  | -        | C18 H31 O3                     | HFA              | ↓                               | -1.51       |
| 269.249    | 1.73                  | -        | C17:0 Heptadecanoic acid       | SFA              | ↓                               | -1.49       |
| 255.233    | 1.55                  | -        | C16:0 Palmitic                 | SFA              | ↓                               | -1.46       |
| 339.326    | 3.2                   | -        | C22:0                          | SFA              | ↓                               | -1.43       |
| 241.217    | 1.37                  | -        | C15:0 Pentadecanoic acid       | SFA              | ↓                               | -1.40       |
| 311.295    | 2.5                   | -        | C20:1                          | MUFA             | ↓                               | -1.40       |
| 239.201    | 1.15                  | -        | C15:1                          | MUFA             | ↓                               | -1.38       |
| 327.233    | 1.21                  | -        | C22:6 Docosahexaenoic acid     | PUFA             | ↓                               | -1.34       |

|         |      |   |                          |      |   |       |
|---------|------|---|--------------------------|------|---|-------|
| 365.342 | 3.22 | - | C24:1                    | MUFA | ↓ | -1.34 |
| 281.248 | 1.61 | - | C18:1 Oleic              | MUFA | ↓ | -1.28 |
| 225.186 | 0.96 | - | C14:1                    | MUFA | ↓ | -1.23 |
| 253.217 | 1.28 | - | C16:1 Palmitoleic acid   | MUFA | ↓ | -1.19 |
| 267.233 | 1.45 | - | C17:1 Heptadecenoic acid | MUFA | ↓ | -1.16 |
| 309.28  | 2.01 | - | C20:2                    | PUFA | ↓ | -1.14 |
| 297.28  | 2.22 | - | C19:0                    | SFA  | ↓ | -1.06 |
| 293.212 | 0.71 | - | C18 H29 O3               | HFA  | ↓ | -0.80 |
| 295.264 | 1.81 | - | C19:1                    | MUFA | ↑ | 1.03  |
| 325.311 | 2.84 | - | C21:0                    | SFA  | ↑ | 1.03  |
| 323.295 | 2.27 | - | C21:1                    | MUFA | ↑ | 1.43  |

48 fatty acids were identified in the list of lipid analytes. The average abundance for each fatty acid in the young (4-11 weeks) and aged (78 weeks) murine brain mitochondria are listed. 43 out of the 48 fatty acids decrease in abundance in the old brain mitochondria compared to the young brain mitochondria. A high proportion of the decreased fatty acids were polyunsaturated (PUFA). Monounsaturated (MUFA), saturated fatty acids (SFA). Two hydroxy-fatty acids (HFA) were in this group.

**Supplementary Table 4. Representative lipid demonstrating the observed increase in abundance of triglycerides (TGs) and decrease in abundance of phosphatidylethanolamines (PEs) with ageing in the skeletal muscle mitochondria.**

| <i>m/z</i> | Retention time (mins) | Adduct | ESI mode | Lipid identity | Fold change |
|------------|-----------------------|--------|----------|----------------|-------------|
| 846.753    | 8.30                  | M+NH4  | +        | TG(50:3)       | 1.92        |
| 874.785    | 9.02                  | M+NH4  | +        | TG(52:3)       | 1.57        |
| 822.600    | 5.63                  | M-H    | -        | PE(42:4)       | -5.17       |
| 764.523    | 4.20                  | M-H    | -        | PE(38:5)       | -3.92       |

The top three identified lipids with the greatest fold change were selected for the representative scatter plots (Fig. 6).
